# Supplementary material for: Equity and Gender Issues Among Members of the Canadian Association of Gastroenterology
Source: PubMed Central journal article supplement — J Can Assoc Gastroenterol. 2018 Aug 28;2(4):170–7. doi: 10.1093/jcag/gwy044 (PMC6785693; doi:10.1093/jcag/gwy044), 2018-08-28
Supplement: gwy044_suppl_supplementary_material.pdf [file gwy044_suppl_supplementary_material.pdf]

# CAG Equity & Gender in GI Needs Assessment Survey

1.

The CAG Equity & Gender committee would appreciate feedback to help determine how we can best meet the needs of all CAG members. Thank you in advance for taking 5 minutes of your time to complete the attached needs assessment survey.

## 2. Demographics

### \*1. Sex

- Male
- Female

### \*2. Age

- <25
- 26-35
- 36-45
- 46-55
- 56-65
- 66+

### \*3. Your Location

I practice/work in the province of:

### \*4. Field of Practice

- Gastroenterologist (adult)
- Gastroenterologist (pediatrics)
- Hepatologist
- Surgeon
- Other (please specify)
- Clinical Scientist
- Basic Scientist
- Resident/Fellow

### \*5. Years in Practice

- 1 - 4 years
- 5 - 10 years
- 11 - 20 years
- 21 - 30 years
- 31+ years

### \*6. Estimated hours worked per week:

# CAG Equity & Gender in GI Needs Assessment Survey

## \*7. Estimated personal gross annual income:

- <\$200K
- \$200-300K
- \$301-400K
- \$401-500K
- \$501-600K
- >\$600K

## \*8. Job description (affiliation):

- Predominantly teaching hospital based
- Predominantly community-based with hospital privileges
- Predominantly community-based without hospital privileges
- None of the above/not applicable

## \*9. If you hold an academic appointment, what is your current academic rank?

- Adjunct Professor
- Assistant Professor
- Associate Professor
- Full Professor
- Professor Emeritus
- N/A
- Other (please specify)

## \*10. Education (select all that apply)

- MD or equivalent
- PhD
- MSc
- Other (please specify)

# CAG Equity & Gender in GI Needs Assessment Survey

## \*11. In which category do you spend most of your time? (select only one)

- Clinical Practice
- Administration (>50%)
- Basic Research (>50%)
- Clinician Researcher (research <=50%)
- Clinical Research (>50%)
- Clinician Teacher (teaching <=50%)
- Teaching (>50%)
- Other

## \*12. Area of Specialization (select the response that best fits your practice):

- General GI
- Hepatology
- IBD
- Therapeutic Endoscopy
- Nutrition
- Motility

## \*13. Administrative Positions Held

- Department Chair/Chief
- Division Chair/Chief
- University/Hospital/Professional Association Committee Chair
- University/Hospital/Professional Association Committee Member
- None of the above

## \*14. Did/Do you have a career mentor(s)?

- Male
- Female
- Both
- No Mentor

## \*15. To what extent are you satisfied with the way that your career path has turned out or is evolving?

- Very Satisfied
- Satisfied
- Neither Satisfied nor Dissatisfied
- Dissatisfied
- Very Dissatisfied

# CAG Equity & Gender in GI Needs Assessment Survey

**\*16. Do you feel that your career advancement has been affected based on age/ethnicity/gender/marital status?**

- Yes
- No

**\*17. Do you have a spouse/partner?**

- No
- Yes

**18. If you answered "yes" to question 17, is your spouse/partner:**

- A homemaker
- A physician
- Non-physician employed outside of home

**\*19. Do you have any children under 18?**

- No
- If yes, how many?

**\*20. Additional Home Life Responsibilities**

|                                                                          | Yes                   | No                    |
|--------------------------------------------------------------------------|-----------------------|-----------------------|
| Do you care for aging relative(s)?                                       | <input type="radio"/> | <input type="radio"/> |
| Do you have another significant area of non-work related responsibility? | <input type="radio"/> | <input type="radio"/> |

**\*21. To what extent do you agree/disagree with the following statement? "I have been able to balance my home/personal life and work life without hindering my career progression."**

- Strongly Agree
- Agree
- Neither Agree nor Disagree
- Disagree
- Strongly Disagree

**\*22. Do you feel that equity (race, age, etc.) and gender issues/challenges exist within gastroenterology?**

- Yes
- No

## CAG Equity & Gender in GI Needs Assessment Survey

**\*23. Would you make any career decisions differently?**

# CAG Equity & Gender in GI Needs Assessment Survey

## 3. Needs Assessment

### \*24. Areas of interest

Please rate the following topics on a scale of 1 (not important to me) to 5 (very important to me)

|                                                                                             | 1                     | 2                     | 3                     | 4                     | 5                     |
|---------------------------------------------------------------------------------------------|-----------------------|-----------------------|-----------------------|-----------------------|-----------------------|
| Work-life balance                                                                           | <input type="radio"/> |
| Leadership skills                                                                           | <input type="radio"/> |
| Negotiation skills                                                                          | <input type="radio"/> |
| Academic promotion                                                                          | <input type="radio"/> |
| Equitable representation/distribution of CAG resources/representation in my province/region | <input type="radio"/> |
| Physician wellbeing                                                                         | <input type="radio"/> |

List other topics of interest for the CAG Gender Affairs Committee here:

### \*25. Potential CAG initiatives

Please rate the following potential roles for the CAG Gender & Equity Committee on a scale of 1 (not interested) to 5 (very interested in participating)

|           | 1                     | 2                     | 3                     | 4                     | 5                     |
|-----------|-----------------------|-----------------------|-----------------------|-----------------------|-----------------------|
| Mentoring | <input type="radio"/> |

### \*26. Mentor/Mentee

|                                         | Yes                   | No                    |
|-----------------------------------------|-----------------------|-----------------------|
| I would be interested in being a mentor | <input type="radio"/> | <input type="radio"/> |
| I would be interested in being a mentee | <input type="radio"/> | <input type="radio"/> |

### \*27. Networking Opportunities

Scale: 1 (not interested) to 5 (very interested in participating)

|                          | 1                     | 2                     | 3                     | 4                     | 5                     |
|--------------------------|-----------------------|-----------------------|-----------------------|-----------------------|-----------------------|
| Networking opportunities | <input type="radio"/> |

### \*28. Preference for Networking:

- I prefer in-person networking opportunities
- I prefer on-line networking opportunities

# CAG Equity & Gender in GI Needs Assessment Survey

## \*29. Discussion Forums

Scale: 1 (not interested) to 5 (very interested in participating)

|                  | 1                     | 2                     | 3                     | 4                     | 5                     |
|------------------|-----------------------|-----------------------|-----------------------|-----------------------|-----------------------|
| Discussion forum | <input type="radio"/> |

## \*30. Preference for Discussion Forums

- I prefer in-person discussion forums
- I prefer on-line discussion forums

## \*31. Professional Development

Scale: 1 (not interested) to 5 (very interested in participating)

|                                        | 1                     | 2                     | 3                     | 4                     | 5                     |
|----------------------------------------|-----------------------|-----------------------|-----------------------|-----------------------|-----------------------|
| Professional development opportunities | <input type="radio"/> |

## \*32. Advocacy

Scale: 1 (not interested) to 5 (very interested in participating)

|                                         | 1                     | 2                     | 3                     | 4                     | 5                     |
|-----------------------------------------|-----------------------|-----------------------|-----------------------|-----------------------|-----------------------|
| Advocacy role in medicine policy issues | <input type="radio"/> |

## 33. Suggest other roles for CAG in supporting issues of gender & equity in gastroenterology
